# Supplementary material
Source: PubMed Central journal article supplement (PMC8341355)
Supplement: advancesADV2020003871_suppl1.pdf [file advancesADV2020003871_suppl1.pdf]

### **Supplementary Table 1:**

#### **A: Antibodies for flow**

|           |                                                 |
|-----------|-------------------------------------------------|
| BIOLEGEND | APC/Fire™ 750 anti-mouse CD45.2 Antibody        |
| BIOLEGEND | Brilliant Violet 785™ anti-mouse F4/80 Antibody |
| BIOLEGEND | FITC anti-mouse/human CD11b Antibody            |
| BIOLEGEND | Brilliant Violet 421™ anti-mouse CD80 Antibody  |
| BIOLEGEND | PE anti-mouse CD206 (MMR) Antibody              |
| BIOLEGEND | APC/Fire™ 750 anti-human CD45 Antibody          |
| BIOLEGEND | APC anti-human CD11b Antibody                   |
| BD        | FITC Mouse Anti-Human CD14                      |
| BD        | PE-anti-human CD68 Antibody                     |
| BD        | PE-anti-human CD163 Antibody                    |
| BD        | PE-anti- human CD206 Antibody                   |
| R&D       | PE-anti-human CD19 Antibody                     |

#### **B: Antibodies for IF:**

|                           |                                |
|---------------------------|--------------------------------|
| Abcam                     | Anti-F4/80 antibody for mouse  |
| Santa Cruz                | Anti-CD68 antibody for human   |
| Thermo Fisher Scientific  | Anti-CD163 antibody for human  |
| Novus Biologicals         | Anti-CD19 antibody for human   |
| Cell Signaling Technology | Anti-pSTAT1 antibody for human |

#### **C: Antibodies for IHC**

|            |                               |
|------------|-------------------------------|
| Boster Bio | Anti-CD68 antibody for mouse  |
| Biolegend  | Anti-CD206 antibody for mouse |
| R&D System | Anti-CD80 antibody for mouse  |

# Figure S1

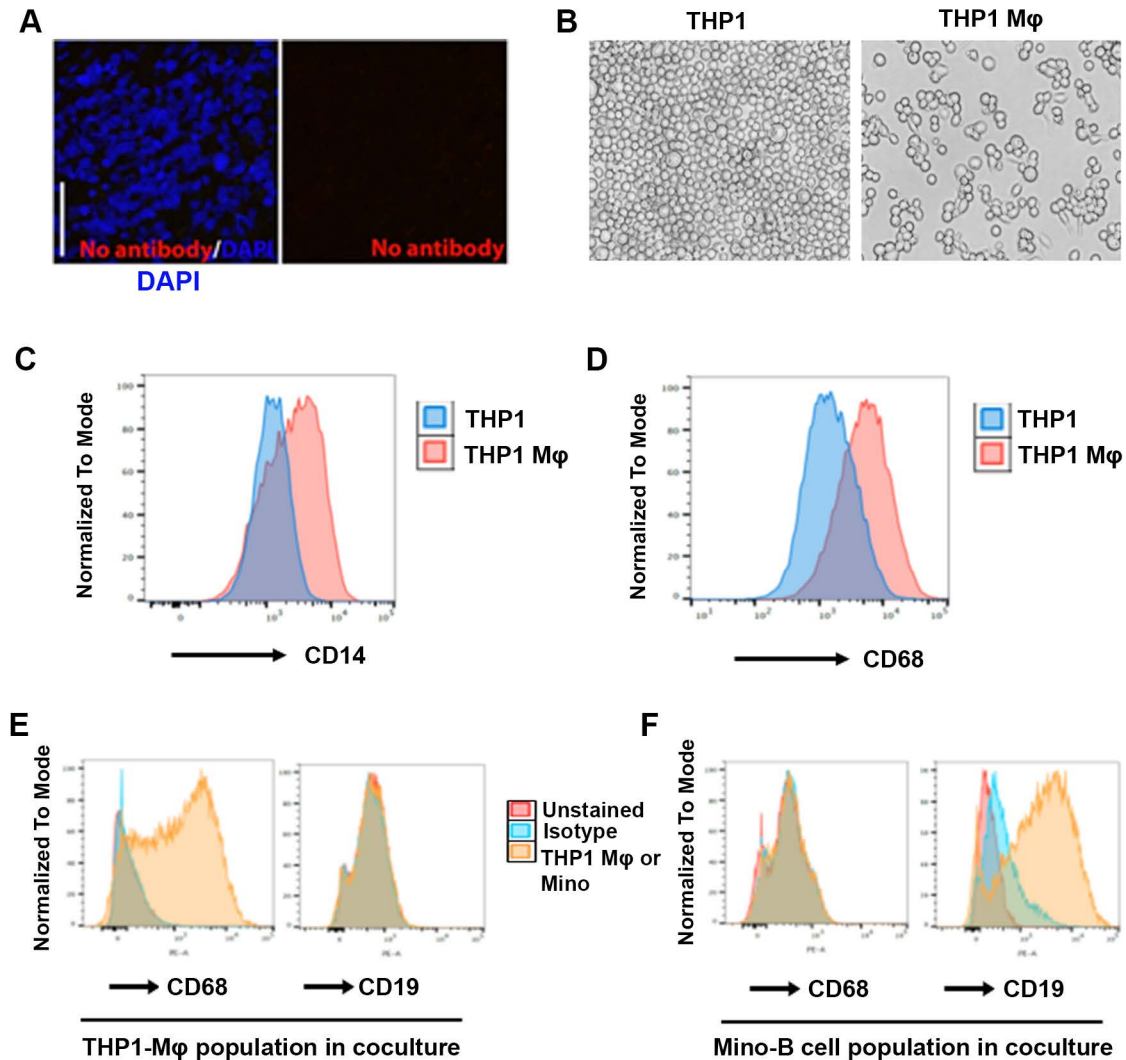

**S1. In-vitro monocytes differentiation.** (A) Immunofluorescent staining was performed on the paraffin fixed MCL mouse syngeneic tumors using no antibody and stained with DAPI (blue). (B) Morphology of the THP1-differentiated macrophages is shown. (C-D) CD14 and CD68 expression was assessed in the THP1-monocytic cell line and THP1-differentiated macrophages. (E-F) Purity of cocultured THP1-macrophages and MCL B-cells were assessed by flow cytometry using CD68 and CD19 antibodies.

# Figure S2

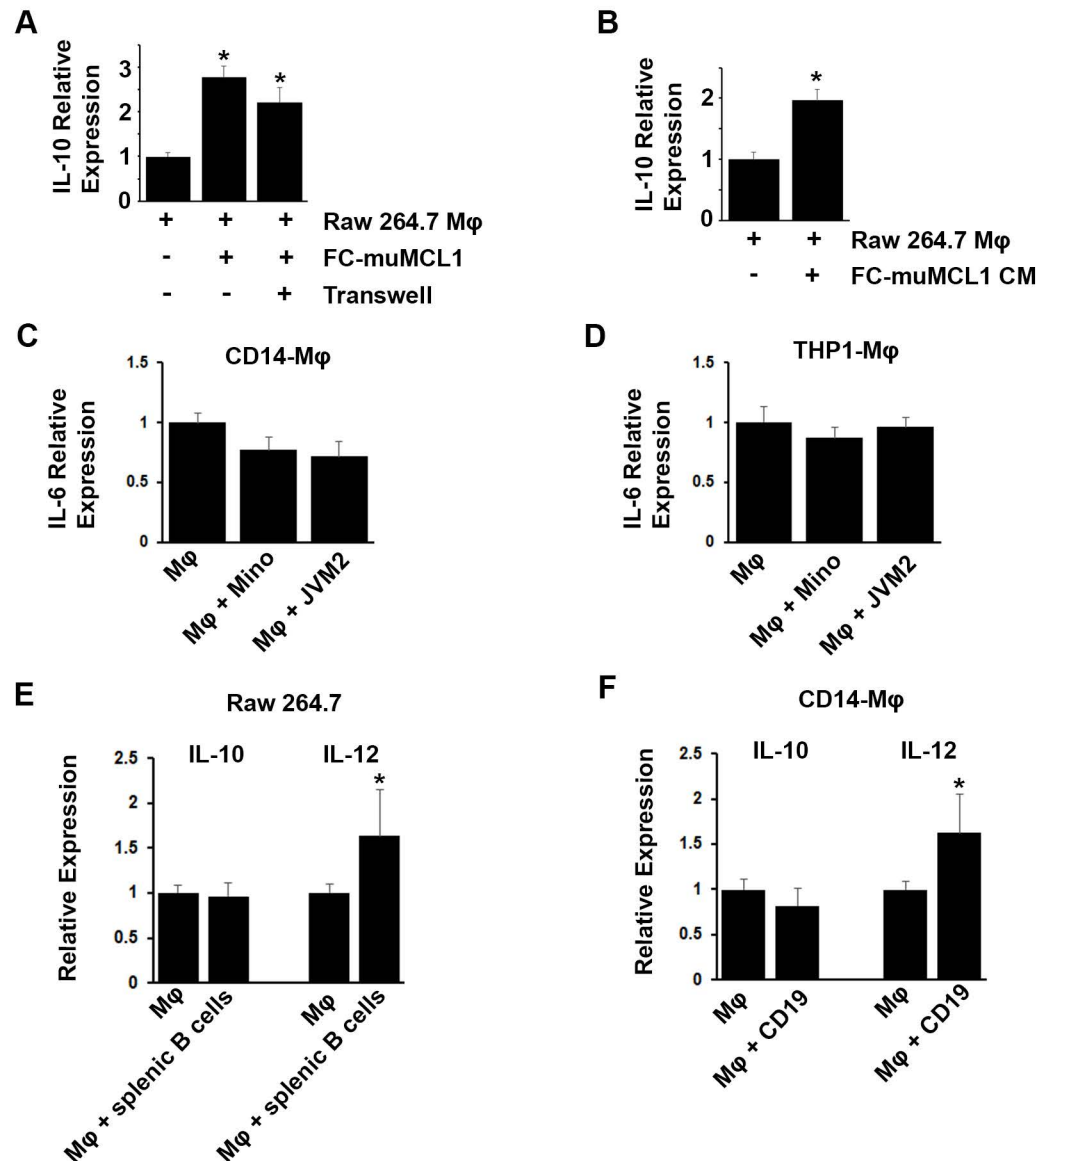

**S2. Assessment of cytokine expression in macrophages co-cultured with murine MCL or normal B-cells.** (A) The mRNA expression of IL-10 in Raw 264.7 (murine monocytic cell line) was measured by QRT-PCR after co-culturing with FC-muMCL1 (murine MCL cell line) with or without trans-well. (B) The mRNA expression of IL-10 in Raw 264.7-Mφ was measured by QRT-PCR after treatment with FC-muMCL1 conditioned media. (C-D) The mRNA expression of IL-6 in CD14-Mφ (C) or THP1-Mφ (D) was measured by QRT-PCR after co-culturing with Mino or JVM2. (E-F) The mRNA expression of IL-10 or IL-12 in Raw 264.7 and CD14-Mφ was measured by QRT-PCR after co-culturing with mouse splenic B cells (E) and normal CD19+ B cells (F).

**Figure S3**

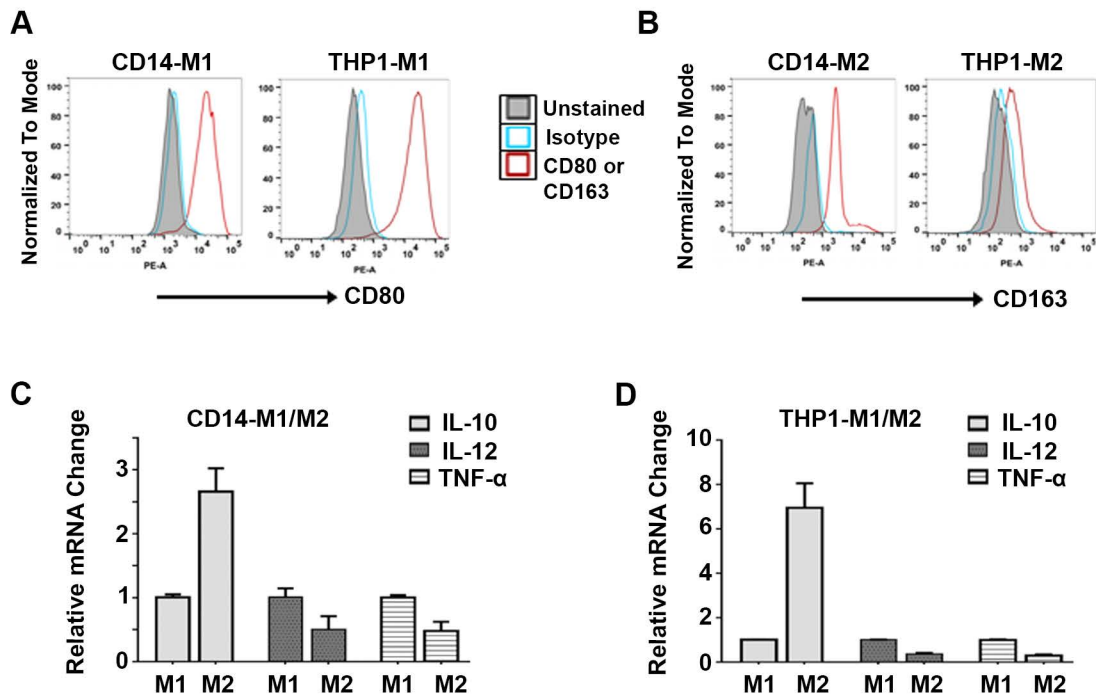

**S3. Surface markers and cytokine expression of THP1 or CD14<sup>+</sup> derived M1 and M2 macrophages.** The expression of surface markers CD80 and CD163 (A-B) or cytokines IL-10, IL-12 and TNF-alpha (C-D) in M1 or M2 macrophages was measured by flow cytometry or QRT-PCR in CD14 or THP1 polarized macrophages.

# Figure S4

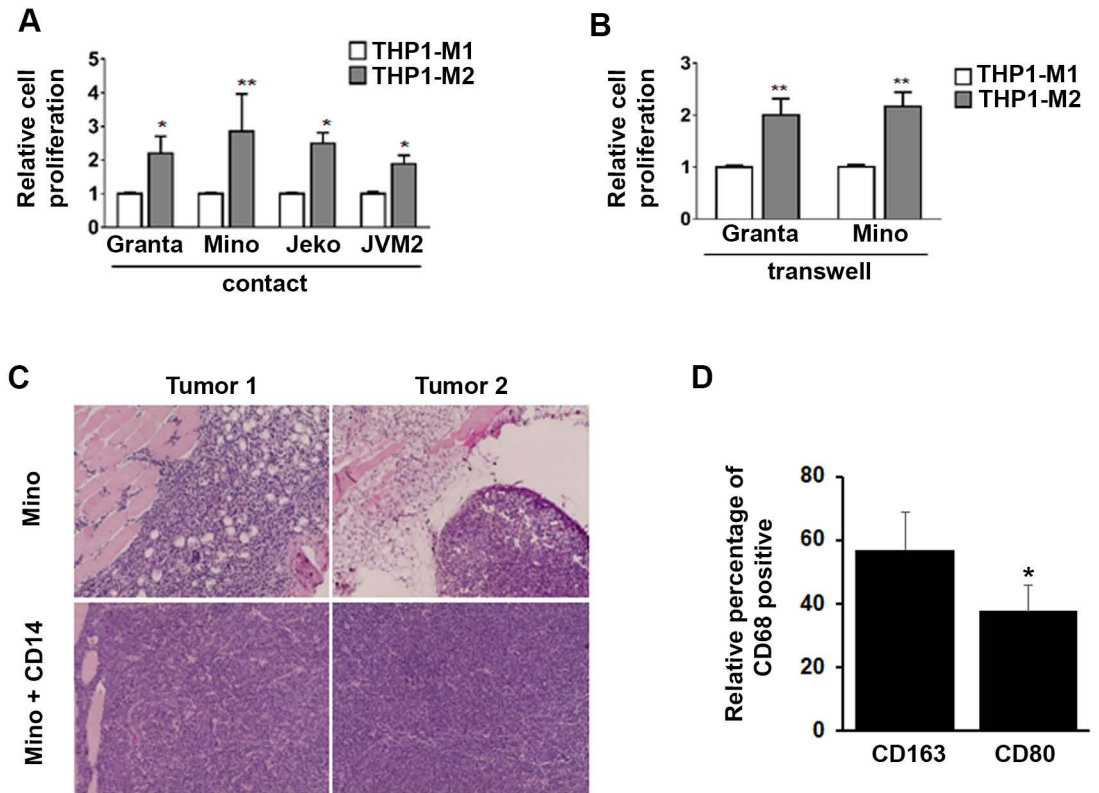

**S4. Effect of M1 and M2 macrophages on the MCL growth.** (A-B) Cell proliferation in MCL was measured by MTT assay using direct (A) or indirect (B) co-culture with trans-well in THP1 M1- or M2-macrophages. Data presented as means  $\pm$  SD from 3 separate experiments. (C) H&E staining of the Mino alone and Mino+CD14<sup>+</sup> monocytes mouse xenograft samples. (D) Relative percentage of CD163 and CD80 positive cells to CD68 positive cells in the mouse xenograft bearing lymphoma with CD14<sup>+</sup> monocytes inoculation. Data presented as means  $\pm$  SD from 15-30 fields of 3 different tumors.

# Figure S5

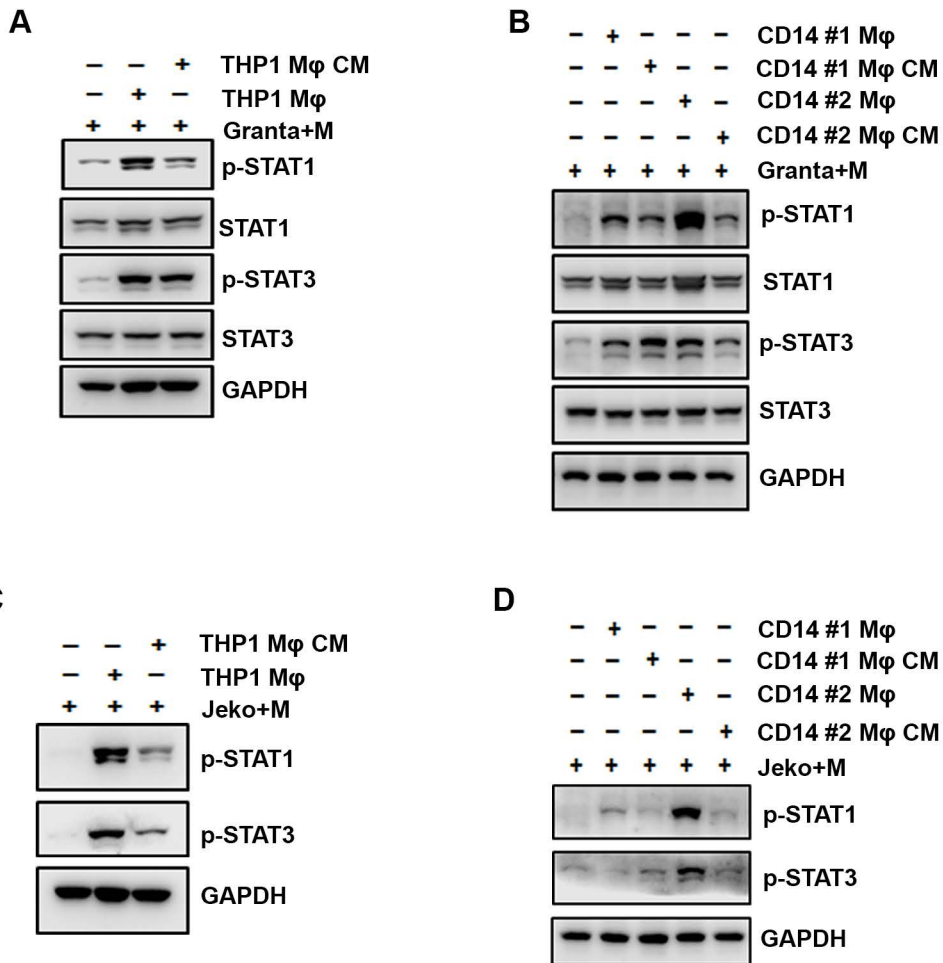

**S5. Effect of macrophage and MCL cell interaction on STAT1 signaling.** STAT1 and STAT3 phosphorylation in Granta (**A-B**) or in Jeko (**C-D**) was measured after direct co-culturing of THP1 or CD14 Mφ or with CM (conditioned-media) collected from the THP1- or CD14-Mφ.

# Figure S6

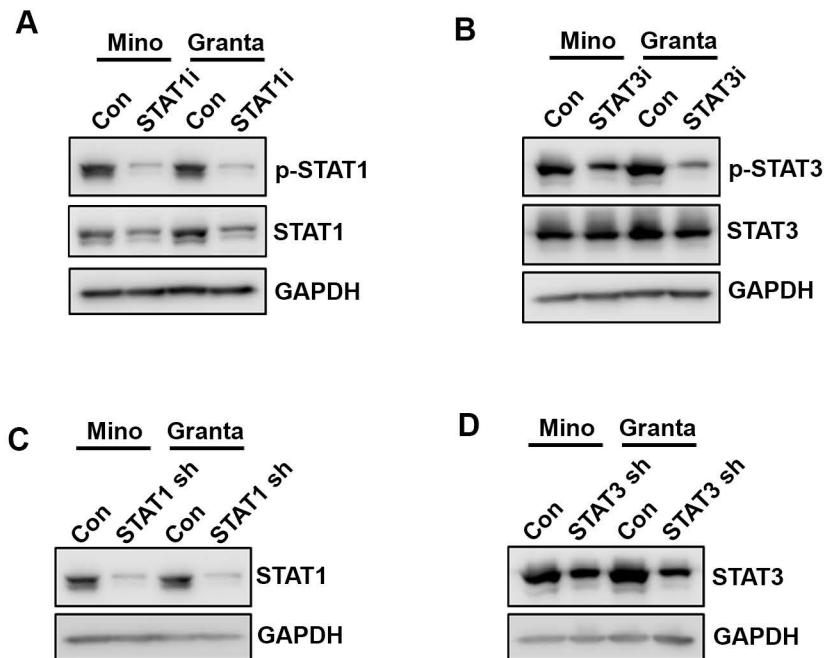

**S6. Effect of STAT1 and STAT3 inhibitors or shRNA on STAT1/3 activation.** (A-B) STAT1 and STAT3 phosphorylation in Mino or Granta was measured after treatment with STAT1 inhibitor fludarabine (A) and STAT3 inhibitor stattic (B). (C-D) Mino or Granta cells were infected with scramble, STAT1, or STAT3 shRNA, and the expression level of STAT1 and STAT3 was measured by western blotting.

**Figure S7**

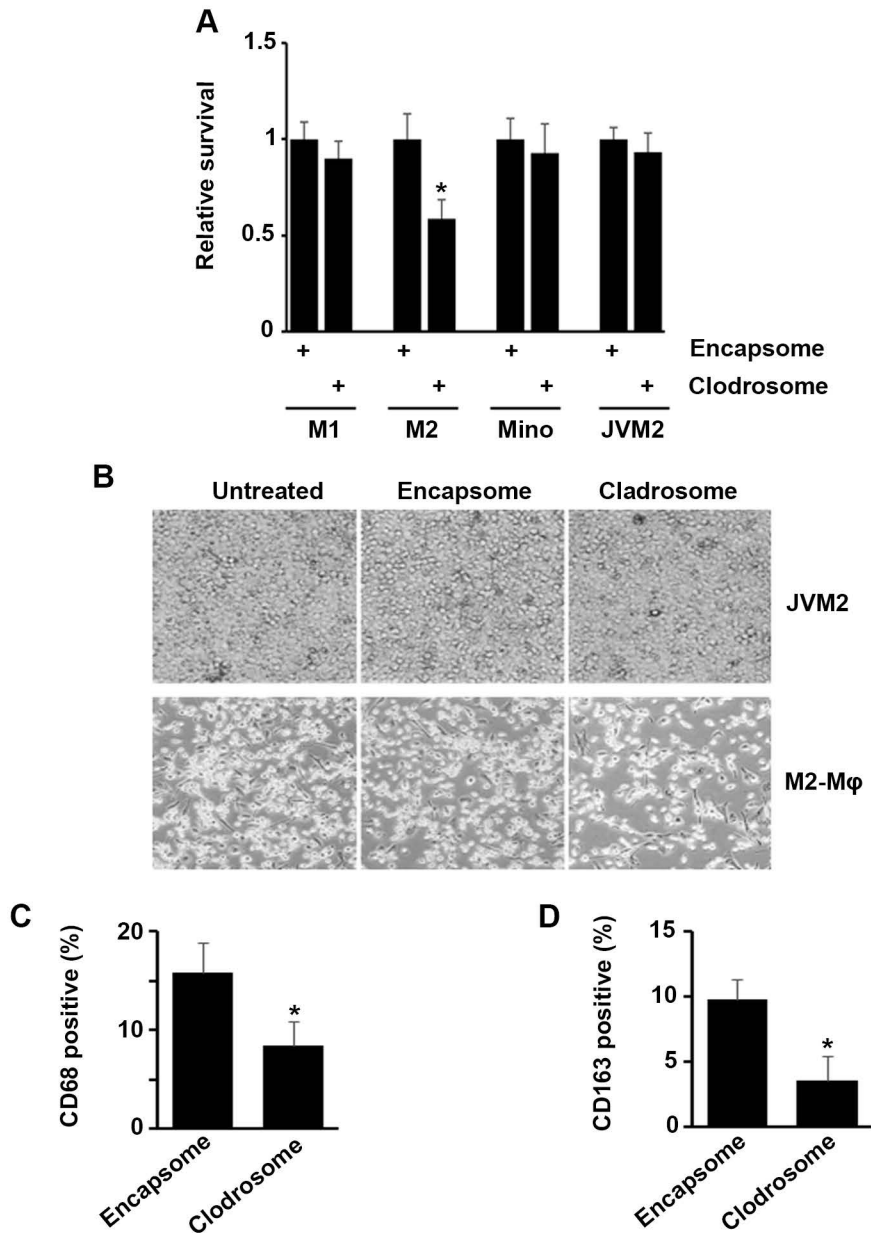

**S7. In-vitro effect of cladrosome on the MCL and macrophages viability. (A-B)** In-vitro polarized THP1-M1 and M2 macrophages or MCL cell lines Mino and JVM2 were exposed to cladrosome or encapsome at a 200  $\mu\text{g}/\text{mL}$  concentration and viability (A) or cell numbers (B) were examined by trypan blue or under microscope respectively. (C-D) Positivity of CD68 and CD163 in the mouse bearing lymphoma treated with cladrosome (200  $\mu\text{g}/\text{mL}$ ) or control (encapsome).
